# Supplementary material
Source: publisher figshare collection journal article supplement (https://tandf.figshare.com/ndownloader/files/22774277)
Supplement: Supplementary file 1 [file 22774277]

Combined experimental and computational approach for the vibrational characteristics and theoretical evaluation of binding activities and ADME descriptors of 2,6-di-tert-butyl-p-cresol

V. Anbu*a, T. Karthickb, K.A. Vijayalakshmic

aResearch and Development Centre, Bharathiar University, Coimbatore, 641046, Tamil Nadu, India

bDepartment of Physics, School of Electrical and Electronics Engineering, SASTRA Deemed University, Thanjavur, 613 401, Tamil Nadu, India

cDepartment of Physics, Sri Vasavi College, Erode, 638 316,Tamil Nadu, India.

*Corresponding Author: v.anbuvee@gmail.com (V. Anbu)

___________________________________________________________________________

**Supplementary Material**

**Table S1.** Accumulation of natural charges and electron population of atoms in core, valence, Rydberg orbitals of 2,6-di-tert-butyl-p-cresol

| Atoms | Charge (e) | Natural Population (e) | | | Total (e) |
| --- | --- | --- | --- | --- | --- |
| Core | Valence | Rydberg |
|  | 0.31896 | 1.99805 | 3.65999 | 0.02300 | 5.68104 |
|  | ‒0.08464 | 1.99895 | 4.06428 | 0.02141 | 6.08464 |
|  | ‒0.19600 | 1.99865 | 4.18230 | 0.01505 | 6.19600 |
|  | ‒0.03641 | 1.99915 | 4.02019 | 0.01707 | 6.03641 |
|  | ‒0.19727 | 1.99865 | 4.18412 | 0.01450 | 6.19727 |
|  | ‒0.05417 | 1.99896 | 4.03434 | 0.02087 | 6.05417 |
|  | ‒0.73314 | 1.99975 | 6.71920 | 0.01419 | 8.73314 |
|  | 0.46677 | 0.0000 | 0.52628 | 0.00695 | 0.53323 |
|  | ‒0.07525 | 1.99917 | 4.05925 | 0.01683 | 6.07525 |
|  | ‒0.55896 | 1.99926 | 4.54831 | 0.01139 | 6.55896 |
|  | 0.19674 | 0.0000 | 0.80170 | 0.00156 | 0.80326 |
|  | 0.19682 | 0.0000 | 0.80163 | 0.00154 | 0.80318 |
|  | 0.20606 | 0.0000 | 0.79245 | 0.00149 | 0.79394 |
|  | ‒0.56413 | 1.99918 | 4.55059 | 0.01436 | 6.56413 |
|  | 0.17038 | 0.0000 | 0.82751 | 0.00211 | 0.82962 |
|  | 0.22615 | 0.0000 | 0.77217 | 0.00168 | 0.77385 |
|  | 0.21604 | 0.0000 | 0.78234 | 0.00162 | 0.78396 |
|  | ‒0.55788 | 1.99924 | 4.54752 | 0.01112 | 6.55788 |
|  | 0.19360 | 0.0000 | 0.80481 | 0.00159 | 0.80640 |
|  | 0.20313 | 0.0000 | 0.79538 | 0.00149 | 0.79687 |
|  | 0.19952 | 0.0000 | 0.79885 | 0.00163 | 0.80048 |
|  | 0.19883 | 0.0000 | 0.79901 | 0.00216 | 0.80117 |
|  | ‒0.57537 | 1.99927 | 4.56773 | 0.00837 | 6.57537 |
|  | 0.20279 | 0.0000 | 0.79547 | 0.00173 | 0.79721 |
|  | 0.20318 | 0.0000 | 0.79507 | 0.00174 | 0.79682 |
|  | 0.19894 | 0.0000 | 0.79941 | 0.00166 | 0.80106 |
|  | 0.20636 | 0.0000 | 0.79145 | 0.00219 | 0.79364 |
|  | ‒0.08121 | 1.99918 | 4.06527 | 0.01676 | 6.08121 |
|  | ‒0.55627 | 1.99924 | 4.54609 | 0.01094 | 6.55627 |
|  | 0.20738 | 0.0000 | 0.79111 | 0.00151 | 0.79262 |
|  | 0.18947 | 0.0000 | 0.80902 | 0.00150 | 0.81053 |
|  | 0.20035 | 0.0000 | 0.79828 | 0.00137 | 0.79965 |
|  | ‒0.56431 | 1.99927 | 4.55424 | 0.01081 | 6.56431 |
|  | 0.19633 | 0.0000 | 0.80198 | 0.00168 | 0.80367 |
|  | 0.19602 | 0.0000 | 0.80233 | 0.00166 | 0.80398 |
|  | 0.19934 | 0.0000 | 0.79926 | 0.00140 | 0.80066 |
|  | ‒0.55730 | 1.99925 | 4.54718 | 0.01088 | 6.55730 |
|  | 0.21075 | 0.0000 | 0.78780 | 0.00145 | 0.78925 |
|  | 0.19952 | 0.0000 | 0.79911 | 0.00137 | 0.80048 |
|  | 0.18887 | 0.0000 | 0.80962 | 0.00150 | 0.81113 |

**Table S2.** Comparison of occupancies and energies of bonding and antibonding molecular orbitals between 2,6-di-tert-butyl-p-cresol and pure benzene.

| Parameters | 2,6-di-tert-butyl-p-cresol | | Benzene | | |
| --- | --- | --- | --- | --- | --- |
| Occupancies (e) | Energies  (a.u.) | Occupancies  (e) | Energies (a.u.) | |
| BD () | 1.96959 | ‒0.69515 | 1.9798 | ‒0.6989 | |
| BD () | 1.96740 | ‒0.69083 | 1.9799 | ‒0.6992 | |
| BD () | 1.99142 | ‒0.81883 |  |  | |
| BD () | 1.96434 | ‒0.68115 | 1.9799 | ‒0.6994 | |
| BD () | 1.96228 | ‒0.59657 |  |  | |
| BD () | 1.97194 | ‒0.67849 | 1.9798 | ‒0.6987 | |
| BD () | 1.97771 | ‒0.51449 |  |  | |
| BD () | 1.97203 | ‒0.67796 | 1.9799 | ‒0.6993 | |
| BD () | 1.98240 | ‒0.58966 |  |  | |
| BD () | 1.96489 | ‒0.67699 | 1.9798 | ‒0.6990 | |
| BD () | 1.97674 | ‒0.51083 |  |  | |
| BD () | 1.96306 | ‒0.58053 |  |  | |
| BD () | 1.98583 | ‒0.78302 |  |  | |
| BD () | 1.97452 | ‒0.59506 |  |  | |
| BD () | 1.97636 | ‒0.60644 |  |  | |
| BD () | 1.97011 | ‒0.59387 |  |  | |
| BD () | 1.98752 | ‒0.51271 |  |  | |
| BD () | 1.98858 | ‒0.51176 |  |  | |
| BD () | 1.98845 | ‒0.50883 |  |  | |
| BD () | 1.94058 | ‒0.53581 |  |  | |
| BD () | 1.98549 | ‒0.52500 |  |  | |
| BD () | 1.98498 | ‒0.52443 |  |  | |
| BD () | 1.98740 | ‒0.51061 |  |  | |
| BD () | 1.98812 | ‒0.50898 |  |  | |
| BD () | 1.98796 | ‒0.51046 |  |  | |
| BD () | 1.98328 | ‒0.50386 |  |  | |
| BD () | 1.98254 | ‒0.50369 |  |  | |
| BD () | 1.99051 | ‒0.50507 |  |  | |
| BD () | 1.97094 | ‒0.57045 |  |  | |
| BD () | 1.97846 | ‒0.57641 |  |  | |
| BD () | 1.97103 | ‒0.56994 |  |  | |
| BD () | 1.98917 | ‒0.48456 |  | |  |
| BD () | 1.98873 | ‒0.48829 |  | |  |
| BD () | 1.98883 | ‒0.48654 |  | |  |
| BD () | 1.98799 | ‒0.49722 |  | |  |
| BD () | 1.98796 | ‒0.49739 |  | |  |
| BD () | 1.98855 | ‒0.49726 |  | |  |
| BD () | 1.98886 | ‒0.48335 |  | |  |
| BD () | 1.98891 | ‒0.48548 |  | |  |
| BD () | 1.98850 | ‒0.48750 |  | |  |
| BD* () | 0.02992 | 0.56967 | 0.0164 | | 0.5792 |
| BD* () | 0.02758 | 0.28802 |  | |  |
| BD* () | 0.02349 | 0.56820 | 0.0163 | | 0.5793 |
| BD* () | 0.03764 | 0.40402 |  | |  |
| BD* () | 0.02428 | 0.57891 | 0.0164 | | 0.5783 |
| BD* () | 0.01611 | 0.46696 |  | |  |
| BD* () | 0.02378 | 0.58419 | 0.0163 | | 0.5792 |
| BD* () | 0.01696 | 0.39919 |  | |  |
| BD* () | 0.35619 | 0.05249 | 0.0164 | | 0.5788 |
| BD* () | 0.01607 | 0.47377 |  | |  |
| BD* () | 0.03685 | 0.41859 |  | |  |
| BD* () | 0.06001 | 0.48883 |  | |  |
| BD* () | 0.02077 | 0.37612 |  | |  |
| BD* () | 0.02342 | 0.36463 |  | |  |
| BD* () | 0.02569 | 0.37501 |  | |  |
| BD* () | 0.00648 | 0.43706 |  | |  |
| BD* () | 0.00677 | 0.43968 |  | |  |
| BD* () | 0.00588 | 0.44109 |  | |  |
| BD* () | 0.00870 | 0.40547 |  | |  |
| BD* () | 0.00789 | 0.42540 |  | |  |
| BD* () | 0.01459 | 0.44503 |  | |  |
| BD* () | 0.00739 | 0.43636 |  | |  |
| BD* () | 0.00626 | 0.44088 |  | |  |
| BD* () | 0.00613 | 0.44077 |  | |  |
| BD* () | 0.00746 | 0.43827 |  | |  |
| BD* () | 0.00791 | 0.43837 |  | |  |
| BD* () | 0.00343 | 0.43894 |  | |  |
| BD* () | 0.02268 | 0.39918 |  | |  |
| BD* () | 0.01902 | 0.39709 |  | |  |
| BD* () | 0.02243 | 0.39967 |  | |  |
| BD* () | 0.00583 | 0.46640 |  | |  |
| BD* () | 0.00749 | 0.45850 |  | |  |
| BD* () | 0.00481 | 0.46087 |  | |  |
| BD* () | 0.00731 | 0.45153 |  | |  |
| BD* () | 0.00717 | 0.45126 |  | |  |
| BD* () | 0.00693 | 0.45880 |  | |  |
| BD* () | 0.00608 | 0.46941 |  | |  |
| BD* () | 0.00518 | 0.46195 |  | | |
| BD* () | 0.00771 | 0.45901 |  | | |

**Table S3.** Observed and calculated vibrational wavenumbers () and vibrational assignments of 2,6 di-tert-butyl-p-cresol.

| Unscaled  wavenumber | Scaled  wavenumber | IR | | Raman | | aAssignments with Major contribution of PED |
| --- | --- | --- | --- | --- | --- | --- |
| Wavenumber | Transmittance | Wavenumber | Raman Activity |
| 3883 | 3671 | 3650 | 64 | 3629 | 13 | 𝜈(O-H)(100) |
| 3203 | 3064 | 3067 | 30 | − | − | 𝜈(C-H)Ring(96) |
| 3137 | 3004 | − | − | 3003 | 28 | 𝜈(C-H)Ring(94) |
| 3103 | 2973 | − | − | 2971 | 87 | 𝜈(C-H)Ring(94) |
| 3092 | 2963 | − | − | 2963 | 84 | 𝜈as(C-H)methyl(96) |
| 3082 | 2954 | 2955 | 77 | − | − | 𝜈as(C-H)methyl(95) |
| 3065 | 2939 | 2939 | 4 | − | − | 𝜈s(C-H)methyl(93) |
| 3035 | 2911 | 2925 | 8 | 2916 | 96 | 𝜈as(C-H)methyl(94) |
| 3015 | 2893 | 2871 | 7 | − | − | 𝜈s(C-H)methyl(91) |
| 1641 | 1611 | − | − | 1607 | 34 | 𝜈(C-C)(63) |
| 1505 | 1481 | 1482 | 84 | − | − | 𝜈(C-C)(56) |
| 1496 | 1472 | − | − | 1472 | 31 | 𝜈(C-C)(58) |
| 1482 | 1459 | − | − | 1453 | 37 | β(C-H)(52) |
| 1480 | 1457 | 1450 | 62 | − | − | β(C-H)(69) |
| 1466 | 1443 | 1432 | 36 | − | − | β(C-H)(52) |
| 1414 | 1394 | 1397 | 21 | 1397 | 14 | β(CH3)(70) |
| 1405 | 1385 | − | − | 1380 | 36 | β(CH3)(67) |
| 1394 | 1374 | 1377 | 66 | − | − | β(CH3)(52) |
| 1393 | 1374 | 1362 | 64 | − | − | β(CH3)(51) |
| 1310 | 1294 | 1307 | 49 | − | − | β(C-H)(64) |
| 1295 | 1279 | 1266 | 70 | − | − | 𝜈(C-C)(48) |
| 1265 | 1250 | 1246 | 64 | 1233 | 14 | β(C-H)(69) |
| 1255 | 1240 | 1231 | 53 | − | − | 𝜈(C-C)sub(43) |
| 1237 | 1223 | 1214 | 38 | 1215 | 33 | 𝜈C−O(63) |
| 1215 | 1202 | 1200 | 44 | 1201 | 51 | β(C-H)(55) |
| 1174 | 1162 | 1152 | 58 | 1155 | 14 | 𝜈(C-C)(49) |
| 1140 | 1129 | 1121 | 32 | − | − | γ(CH3)(51) |
| 1045 | 1036 | − | − | 1035 | 13 | 𝜈(C-C)sub(45) |
| 1042 | 1033 | 1027 | 52 | − | − | 𝜈(C-C)sub(51) |
| 968 | 961 | − | − | − | − | 𝜈(C-C)(42) |
| 959 | 952 | − | − | 952 | 84 | 𝜈(C-C)sub(52) |
| 939 | 933 | 935 | 74 | 936 | 53 | 𝜌(CH3)(72) |
| 889 | 883 | 888 | 79 | − | − | 𝜌(CH3)(76) |
| 882 | 877 | 867 | 74 | − | − | β(C-C-C)(40) |
| 780 | 777 | 775 | 81 | 777 | 51 | β(C-C-C)(47) |
| 758 | 755 | 769 | 57 | 759 | 16 | βRing(51) |
| 634 | 633 | − | − | 633 | 23 | γRing(82) |
| 625 | 624 | 619 | 42 | − | − | β(C-C-C)(52) |
| 590 | 589 | 580 | 84 | − | − | γRing(79) |
| 561 | 561 | − | − | 558 | 95 | γ(O-H)(82) |
| 458 | 458 | 464 | 72 | 472 | 70 | τCH3(90) |
| 388 | 389 | − | − | 391 | 19 | τCH3(83) |
| 325 | 327 | − | − | 325 | 36 | γ(C-C-C)(56) |
| 280 | 281 | − | − | 286 | 70 | γ(C-C-C)(57) |
| 225 | 226 | − | − | 226 | 43 | τCH3(100) |

a𝜈; stretching, β; in-plane bending, γ; out-of-plane bending, 𝜌; rocking, τ; torsion.
